# Supplementary material for: Demography and evolutionary history of grey wolf populations around the Bering Strait
Source: PubMed Central journal article supplement — Mol Ecol. 2022 Jul 29;31(18):4851–65. doi: 10.1111/mec.16613 (PMC9545117; doi:10.1111/mec.16613), 2022-07-29
Supplement: MEC-31-4851-s001.pdf [file MEC-31-4851-s001.pdf]

## Supplemental information for:

### Demography and evolutionary history of grey wolf populations around the Bering Strait

Carolina Pacheco<sup>1,2,3\*</sup>, Astrid Vik Stronen<sup>4,5,6</sup>, Bogumiła Jędrzejewska<sup>7</sup>, Kamila Plis<sup>7</sup>,  
Innokentiy M. Okhlopkov<sup>8</sup>, Nikolay V. Mamaev<sup>8</sup>, Sergei V. Drovetski<sup>9</sup>, Raquel Godinho<sup>1,2,3\*</sup>

<sup>1</sup> CIBIO, Centro de Investigação em Biodiversidade e Recursos Genéticos, InBIO Laboratório Associado, Campus de Vairão, Universidade do Porto, Vairão, Portugal

<sup>2</sup>Department of Biology, Faculty of Sciences, University of Porto, Porto, Portugal

<sup>3</sup>BIOPOLIS, Program in Genomics, Biodiversity and Land Planning, CIBIO, Campus de Vairão, Vairão, Portugal

<sup>4</sup>Department of Biology, Biotechnical Faculty, University of Ljubljana, Ljubljana, Slovenia

<sup>5</sup>Department of Biotechnology and Life Sciences, Insubria University, Varese, Italy

<sup>6</sup>Department of Chemistry and Bioscience, Aalborg University, Aalborg, Denmark

<sup>7</sup>Mammal Research Institute, Polish Academy of Sciences, Białowieża, Poland

<sup>8</sup>Institute of Biological Problems of Cryolithozone, Siberian Branch of Russian Academy of Sciences, Yakutsk, Russia

<sup>9</sup>Department of Vertebrate Zoology, National Museum of Natural History, Smithsonian Institution, Washington, DC, USA

\*Correspondence: [carolina.pacheco@cibio.up.pt](mailto:carolina.pacheco@cibio.up.pt) (C.P.); [rgodinho@cibio.up.pt](mailto:rgodinho@cibio.up.pt) (R.G.)

#### **This PDF file includes:**

Supplemental Figures (Figure S1 to S8)

Supplemental Tables (Table S1)

## SUPPLEMENTAL FIGURES

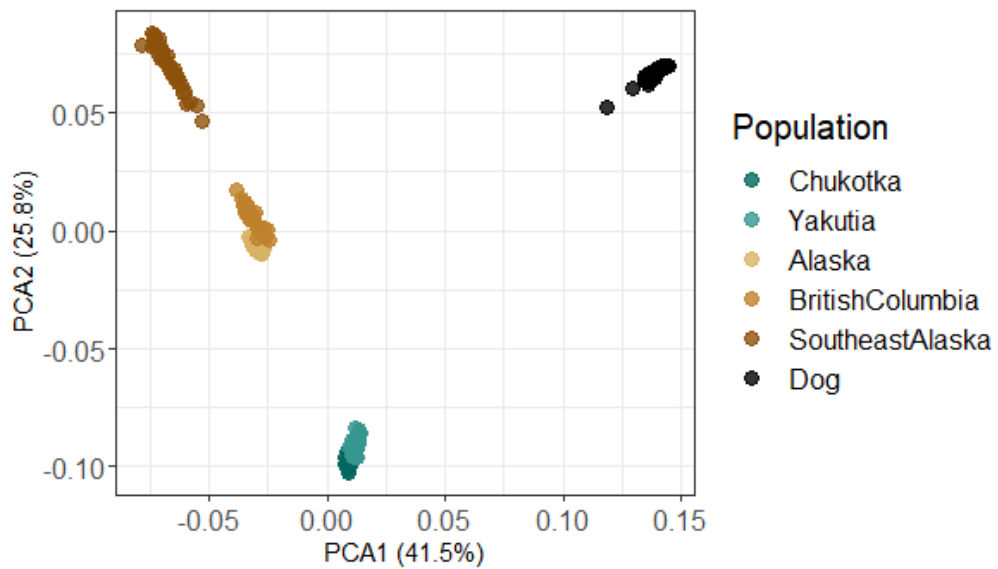

**Figure S1.** PCA plot of all wolves used in this study plus 36 mixed breed dogs genotyped for the same SNP panel by Cronin et al., (2015) and Medrano et al., (2014). This analysis was done with the 56K SNP dataset described in the “Population structure and differentiation” section of the Methods in the main text.

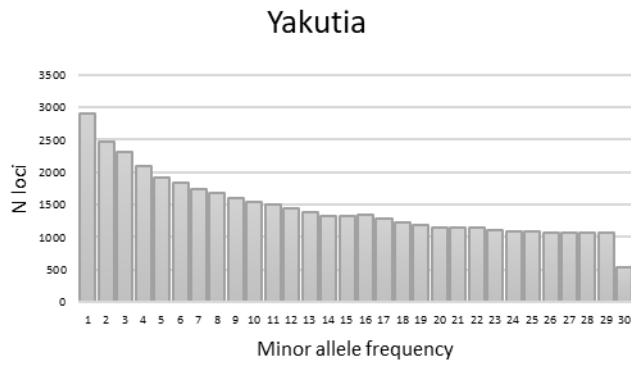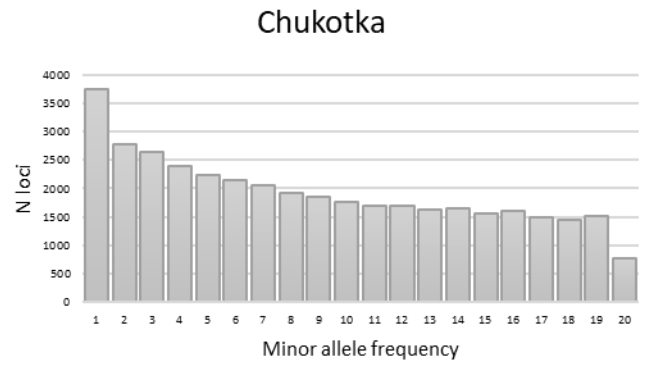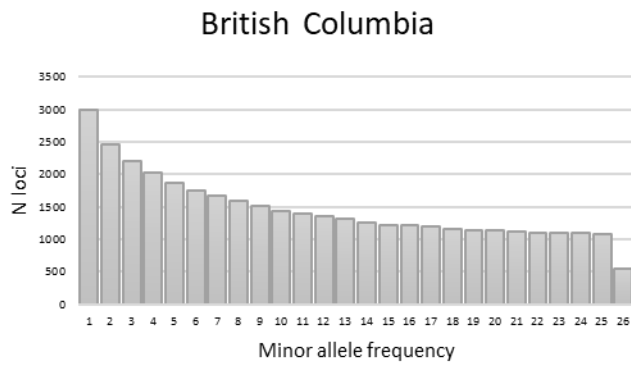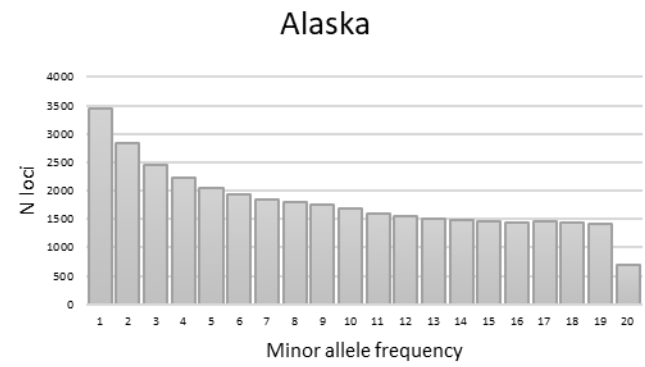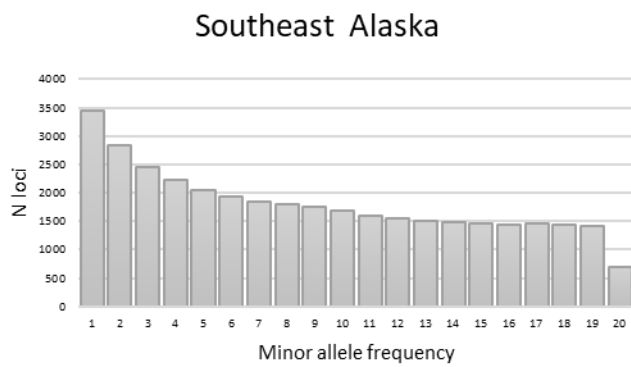

**Figure S2.** Site frequency spectrum (SFS) of the different populations used as input for the STAIRWAY PLOT analysis.

**K3**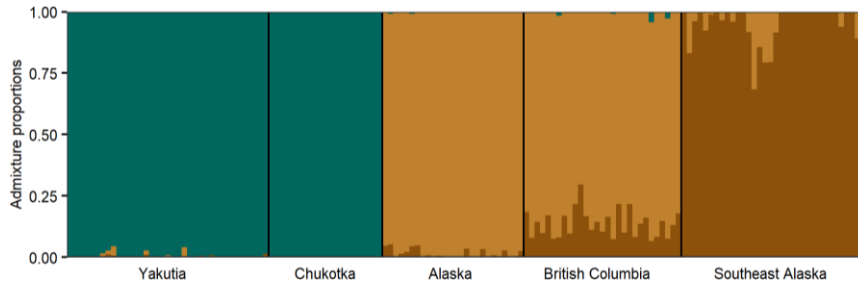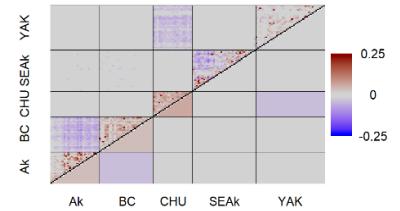**K4**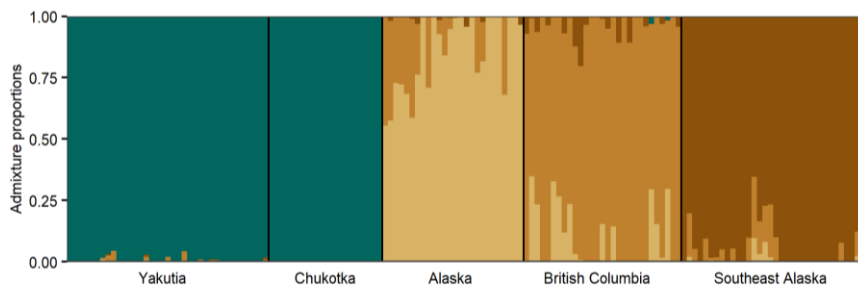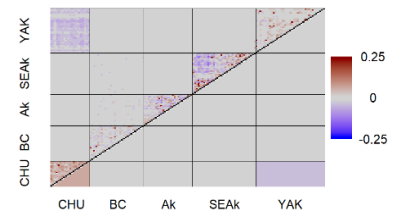**K5**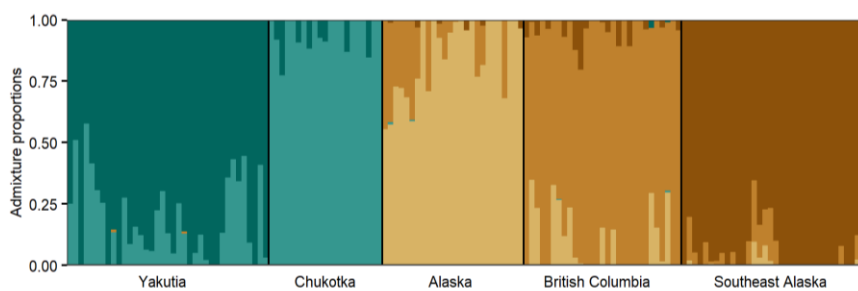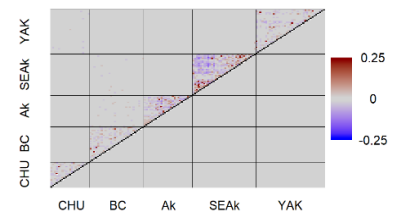

**Figure S3.** Population structure of grey wolves around the Bering Strait based on 56K SNPs inferred with ADMIXTURE analysis with assumed number of ancestral populations ( $K$ ) ranging from 3 to 5 (left). Each vertical bar represents an individual and the colouring corresponds to its genetic ancestry. Matrix of pairwise correlations for residuals between true genotypes and genotypes predicted by the admixture model inferred with EVALADMIX analysis (right) using all grey wolves individuals for  $K$  ranging from 3 to 5. Values above the diagonal line indicate individual pairwise correlation and values under the diagonal indicate population mean correlations. Values deviating from zero indicate a poor fit of the admixture model to the data.

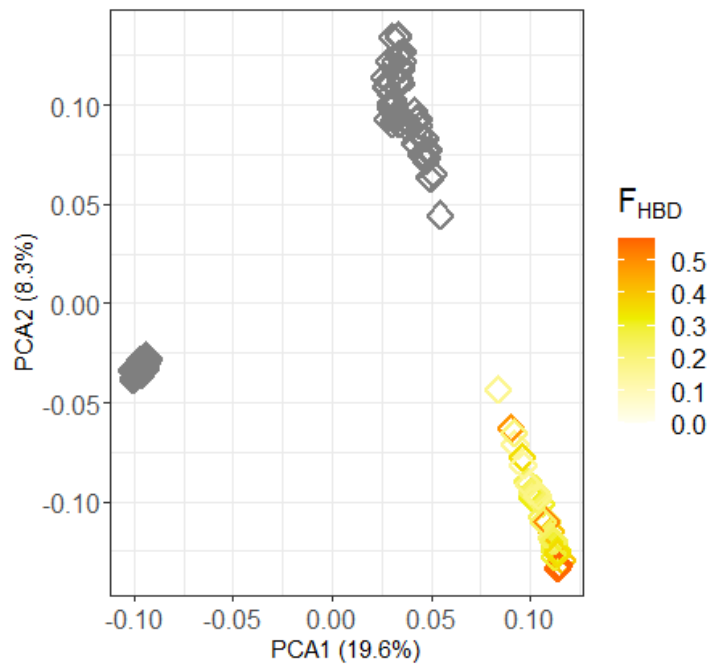

**Figure S4.** PCA plot of all wolves based on the 56K SNP dataset. The Southeast Alaska population is coloured based on inbreeding estimated by  $F_{HBD}$ .

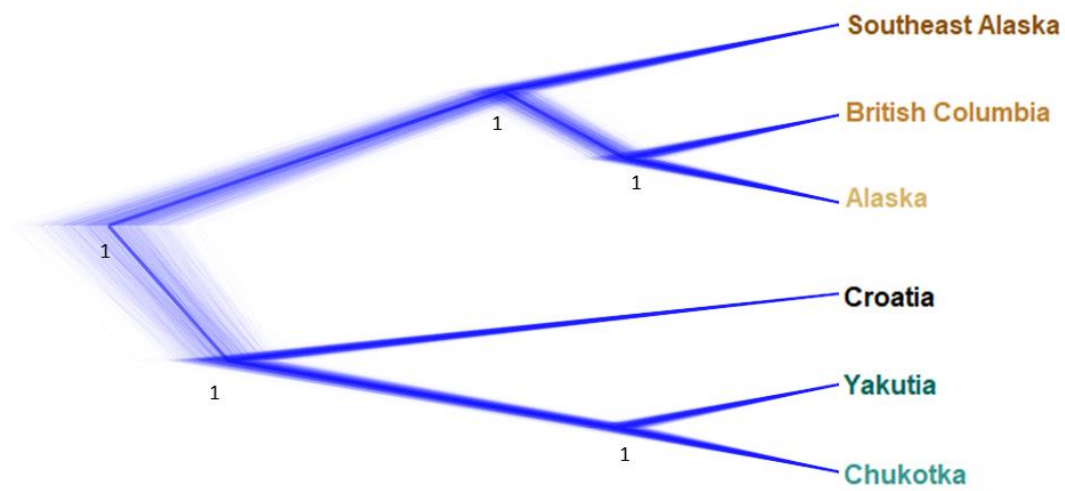

**Figure S5.** Phylogenetic trees from Bayesian coalescent analysis of SNP data using SNAPP with the same set of individuals as presented in Figure 4 of the main text. The thick line shows the consensus tree, and the numbers at each node denote the posterior probability.

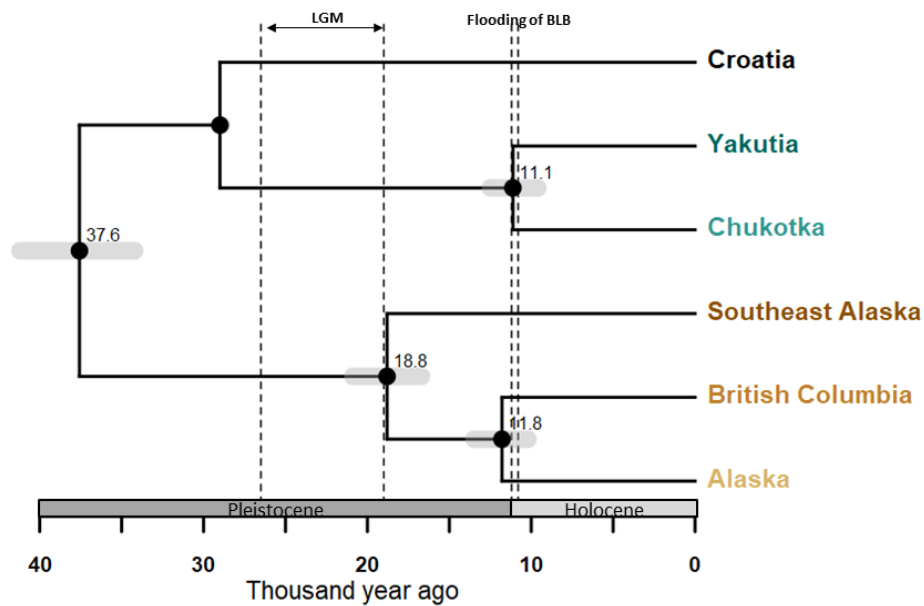

**Figure S6.** Chronogram of wolf populations resulting from Bayesian coalescent analysis of SNP data using SNAPP. This analysis was performed with a different set of individuals than used in Figure 4 of the main text but selected based on the same criteria. Median ages are provided above nodes, with 95% highest posterior densities (HPD) represented by the grey bars below. The x-axis corresponds to time before present in thousands of years. The vertical dashed lines indicate the intervals of the Last Glacial Maximum (LGM) and the estimated flooding of the Bering Land Bridge (BLB).

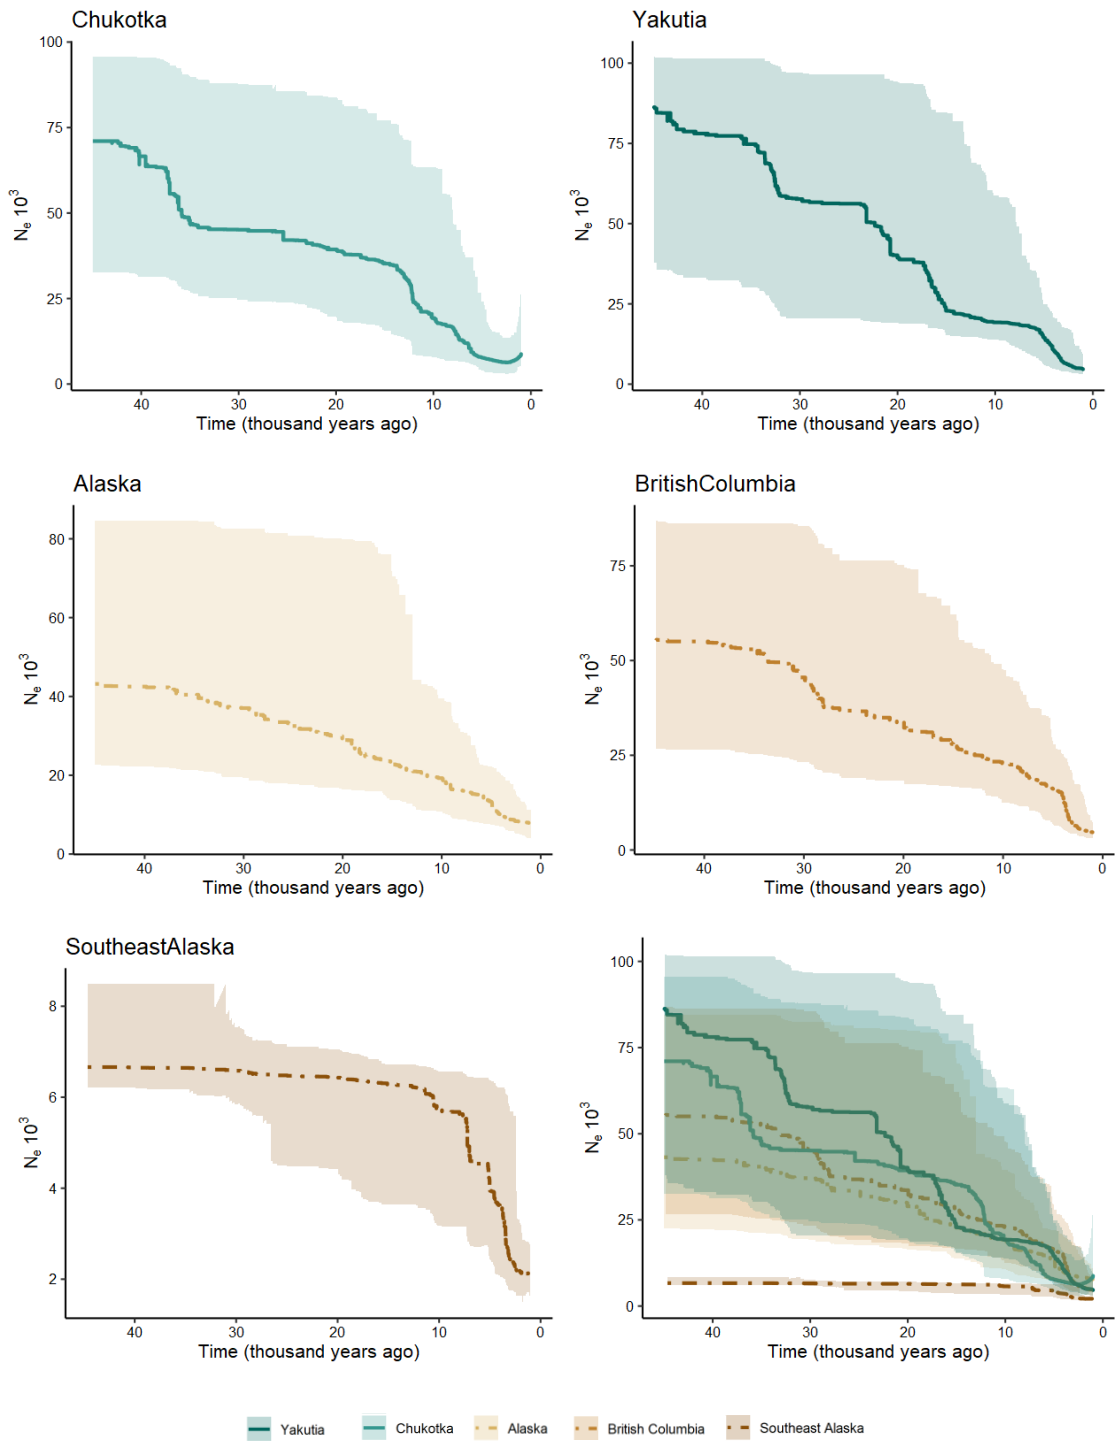

**Figure S7.** Reconstruction of demographic history with STAIRWAY PLOT, showing historic estimates of temporal  $N_E$  for each population. Lines indicate the median and the shaded ribbon indicates the 95% intervals of the estimated  $N_E$ , plotted from the past to the present.



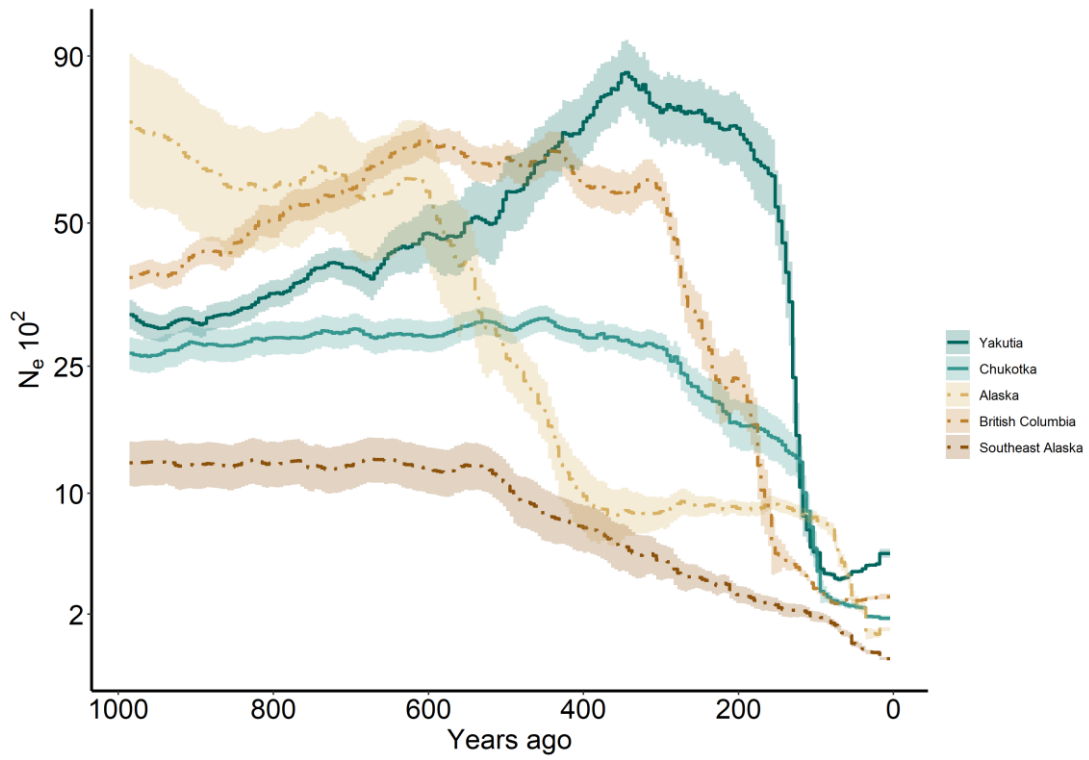

**Figure S8.** Reconstruction of temporal  $N_e$  across the past 1000 years inferred using GONE. The shadow area gives the 95% confidence interval of the estimates obtained by running 50 replicates, each corresponding to a random sample of 19 chromosomes per individual (half of the total number of chromosomes).

## SUPPLEMENTAL TABLE

**Table S1.** Sample information for the dataset used in this study. We genotyped 58 Russian wolves, sampled between 2008 and 2011, and used available data from 89 North American wolves. The table presents the country, region, and locality of origin for each sample, the individual sex, and the reference for genotypes. All samples from Russian wolves were muscle tissue. nd: not determined.

| Sample ID | Country | Region   | Locality                        | Sex | Reference  |
|-----------|---------|----------|---------------------------------|-----|------------|
| CHU467    | Russia  | Chukotka | UstndBelaya                     | M   | This study |
| CHU468    | Russia  | Chukotka | UstndBelaya                     | F   | This study |
| CHU469    | Russia  | Chukotka | UstndBelaya                     | F   | This study |
| CHU470    | Russia  | Chukotka | UstndBelaya                     | M   | This study |
| CHU472    | Russia  | Chukotka | UstndBelaya                     | M   | This study |
| CHU473    | Russia  | Chukotka | UstndBelaya                     | M   | This study |
| CHU477    | Russia  | Chukotka | UstndBelaya                     | M   | This study |
| CHU478    | Russia  | Chukotka | UstndBelaya                     | M   | This study |
| CHU479    | Russia  | Chukotka | UstndBelaya                     | F   | This study |
| CHU480    | Russia  | Chukotka | UstndBelaya                     | M   | This study |
| CHU482    | Russia  | Chukotka | UstndBelaya                     | M   | This study |
| CHU483    | Russia  | Chukotka | UstndBelaya                     | M   | This study |
| CHU484    | Russia  | Chukotka | UstndBelaya                     | F   | This study |
| CHU485    | Russia  | Chukotka | UstndBelaya                     | F   | This study |
| CHU486    | Russia  | Chukotka | UstndBelaya                     | F   | This study |
| CHU487    | Russia  | Chukotka | UstndBelaya                     | F   | This study |
| CHU489    | Russia  | Chukotka | Mouth of the river Kanchelan    | F   | This study |
| CHU490    | Russia  | Chukotka | Mouth of the river Kanchelan    | M   | This study |
| CHU491    | Russia  | Chukotka | Lake Chistoe (Magadan Oblast)   | M   | This study |
| CHU492    | Russia  | Chukotka | Kanchalan village (UstndBelaya) | F   | This study |
| CHU493    | Russia  | Chukotka | Kanchalan village (UstndBelaya) | F   | This study |
| YAK1444   | Russia  | Yakutia  | Batagay                         | nd  | This study |
| YAK1446   | Russia  | Yakutia  | Saidy                           | M   | This study |
| YAK1447   | Russia  | Yakutia  | Kharyyalakh                     | M   | This study |
| YAK1448   | Russia  | Yakutia  | Bulun                           | M   | This study |
| YAK1449   | Russia  | Yakutia  | EngyandSaylyga                  | F   | This study |
| YAK1451   | Russia  | Yakutia  | Bala                            | F   | This study |
| YAK1452   | Russia  | Yakutia  | Markha                          | nd  | This study |
| YAK1454   | Russia  | Yakutia  | Tomtor                          | M   | This study |
| YAK1455   | Russia  | Yakutia  | Uritskoye                       | F   | This study |
| YAK1456   | Russia  | Yakutia  | Markha                          | nd  | This study |
| YAK1458   | Russia  | Yakutia  | EngyandSaylyga                  | nd  | This study |
| YAK1460   | Russia  | Yakutia  | Salban                          | M   | This study |
| YAK1464   | Russia  | Yakutia  | Kystatyam                       | nd  | This study |
| YAK1469   | Russia  | Yakutia  | Stolby                          | nd  | This study |
| YAK1470   | Russia  | Yakutia  | Ugoyan                          | M   | This study |
| YAK1472   | Russia  | Yakutia  | Ert                             | nd  | This study |
| YAK1473   | Russia  | Yakutia  | Kystatyam                       | M   | This study |
| YAK1474   | Russia  | Yakutia  | Kystatyam                       | nd  | This study |

| Sample ID | Country | Region           | Locality       | Sex | Reference                                    |
|-----------|---------|------------------|----------------|-----|----------------------------------------------|
| YAK1476   | Russia  | Yakutia          | Berdinka       | M   | This study                                   |
| YAK1477   | Russia  | Yakutia          | Sebyanndkyuyol | M   | This study                                   |
| YAK1483   | Russia  | Yakutia          | Abaga          | F   | This study                                   |
| YAK1484   | Russia  | Yakutia          | Aldan          | F   | This study                                   |
| YAK1485   | Russia  | Yakutia          | Tympy          | nd  | This study                                   |
| YAK1486   | Russia  | Yakutia          | Tympy          | nd  | This study                                   |
| YAK1489   | Russia  | Yakutia          | UstndMaya      | nd  | This study                                   |
| YAK1492   | Russia  | Yakutia          | Sebyanndkyuyol | F   | This study                                   |
| YAK1493   | Russia  | Yakutia          | Diupsya        | M   | This study                                   |
| YAK1494   | Russia  | Yakutia          | Byadi          | M   | This study                                   |
| YAK1495   | Russia  | Yakutia          | Bolugur        | F   | This study                                   |
| YAK1498   | Russia  | Yakutia          | Kresndkhalzhai | nd  | This study                                   |
| YAK1499   | Russia  | Yakutia          | Teply klyuch   | M   | This study                                   |
| YAK1501   | Russia  | Yakutia          | Saydy          | F   | This study                                   |
| YAK1503   | Russia  | Yakutia          | Mekimdya       | nd  | This study                                   |
| YAK1504   | Russia  | Yakutia          | Uolba          | F   | This study                                   |
| YAK1509   | Russia  | Yakutia          | DaiandAmgata   | F   | This study                                   |
| YAK1510   | Russia  | Yakutia          | Saydy          | F   | This study                                   |
| YAK1512   | Russia  | Yakutia          | Saidy          | nd  | This study                                   |
| BC38      | Canada  | British Columbia | nd             | nd  | Cronin et al. (2015) & Medrano et al. (2014) |
| BC41      | Canada  | British Columbia | nd             | nd  | Cronin et al. (2015) & Medrano et al. (2014) |
| BC42      | Canada  | British Columbia | nd             | nd  | Cronin et al. (2015) & Medrano et al. (2014) |
| BC43      | Canada  | British Columbia | nd             | nd  | Cronin et al. (2015) & Medrano et al. (2014) |
| BC44      | Canada  | British Columbia | nd             | nd  | Cronin et al. (2015) & Medrano et al. (2014) |
| BC45      | Canada  | British Columbia | nd             | nd  | Cronin et al. (2015) & Medrano et al. (2014) |
| BC46      | Canada  | British Columbia | nd             | nd  | Cronin et al. (2015) & Medrano et al. (2014) |
| BC47      | Canada  | British Columbia | nd             | nd  | Cronin et al. (2015) & Medrano et al. (2014) |
| BC48      | Canada  | British Columbia | nd             | nd  | Cronin et al. (2015) & Medrano et al. (2014) |
| BC49      | Canada  | British Columbia | nd             | nd  | Cronin et al. (2015) & Medrano et al. (2014) |
| BC51      | Canada  | British Columbia | nd             | nd  | Cronin et al. (2015) & Medrano et al. (2014) |
| BC52      | Canada  | British Columbia | nd             | nd  | Cronin et al. (2015) & Medrano et al. (2014) |
| BC53      | Canada  | British Columbia | nd             | nd  | Cronin et al. (2015) & Medrano et al. (2014) |
| BC54      | Canada  | British Columbia | nd             | nd  | Cronin et al. (2015) & Medrano et al. (2014) |
| BC56      | Canada  | British Columbia | nd             | nd  | Cronin et al. (2015) & Medrano et al. (2014) |
| BC57      | Canada  | British Columbia | nd             | nd  | Cronin et al. (2015) & Medrano et al. (2014) |
| BC59      | Canada  | British Columbia | nd             | nd  | Cronin et al. (2015) & Medrano et al. (2014) |
| BC60      | Canada  | British Columbia | nd             | nd  | Cronin et al. (2015) & Medrano et al. (2014) |

| <b>Sample ID</b> | <b>Country</b>           | <b>Region</b>    | <b>Locality</b> | <b>Sex</b> | <b>Reference</b>                             |
|------------------|--------------------------|------------------|-----------------|------------|----------------------------------------------|
| BC61             | Canada                   | British Columbia | nd              | nd         | Cronin et al. (2015) & Medrano et al. (2014) |
| BC62             | Canada                   | British Columbia | nd              | nd         | Cronin et al. (2015) & Medrano et al. (2014) |
| BC63             | Canada                   | British Columbia | nd              | nd         | Cronin et al. (2015) & Medrano et al. (2014) |
| BC64             | Canada                   | British Columbia | nd              | nd         | Cronin et al. (2015) & Medrano et al. (2014) |
| BC65             | Canada                   | British Columbia | nd              | nd         | Cronin et al. (2015) & Medrano et al. (2014) |
| BC66             | Canada                   | British Columbia | nd              | nd         | Cronin et al. (2015) & Medrano et al. (2014) |
| BC67             | Canada                   | British Columbia | nd              | nd         | Cronin et al. (2015) & Medrano et al. (2014) |
| BC68             | Canada                   | British Columbia | nd              | nd         | Cronin et al. (2015) & Medrano et al. (2014) |
| BC155            | Canada                   | British Columbia | nd              | nd         | Cronin et al. (2015) & Medrano et al. (2014) |
| BC316            | Canada                   | British Columbia | nd              | nd         | Cronin et al. (2015) & Medrano et al. (2014) |
| BC317            | Canada                   | British Columbia | nd              | nd         | Cronin et al. (2015) & Medrano et al. (2014) |
| Ak70             | United States of America | Interior Alaska  | nd              | nd         | Cronin et al. (2015) & Medrano et al. (2014) |
| Ak71             | United States of America | Interior Alaska  | nd              | nd         | Cronin et al. (2015) & Medrano et al. (2014) |
| Ak72             | United States of America | Interior Alaska  | nd              | nd         | Cronin et al. (2015) & Medrano et al. (2014) |
| Ak73             | United States of America | Interior Alaska  | nd              | nd         | Cronin et al. (2015) & Medrano et al. (2014) |
| Ak74             | United States of America | Interior Alaska  | nd              | nd         | Cronin et al. (2015) & Medrano et al. (2014) |
| Ak75             | United States of America | Interior Alaska  | nd              | nd         | Cronin et al. (2015) & Medrano et al. (2014) |
| Ak76             | United States of America | Interior Alaska  | nd              | nd         | Cronin et al. (2015) & Medrano et al. (2014) |
| Ak77             | United States of America | Interior Alaska  | nd              | nd         | Cronin et al. (2015) & Medrano et al. (2014) |
| Ak80             | United States of America | Interior Alaska  | nd              | nd         | Cronin et al. (2015) & Medrano et al. (2014) |
| Ak83             | United States of America | Interior Alaska  | nd              | nd         | Cronin et al. (2015) & Medrano et al. (2014) |
| Ak84             | United States of America | Interior Alaska  | nd              | nd         | Cronin et al. (2015) & Medrano et al. (2014) |
| Ak89             | United States of America | Interior Alaska  | nd              | nd         | Cronin et al. (2015) & Medrano et al. (2014) |
| Ak91             | United States of America | Interior Alaska  | nd              | nd         | Cronin et al. (2015) & Medrano et al. (2014) |
| Ak140            | United States of America | Interior Alaska  | nd              | nd         | Cronin et al. (2015) & Medrano et al. (2014) |
| Ak141            | United States of America | Interior Alaska  | nd              | nd         | Cronin et al. (2015) & Medrano et al. (2014) |
| Ak142            | United States of America | Interior Alaska  | nd              | nd         | Cronin et al. (2015) & Medrano et al. (2014) |
| Ak143            | United States of America | Interior Alaska  | nd              | nd         | Cronin et al. (2015) & Medrano et al. (2014) |
| Ak144            | United States of America | Interior Alaska  | nd              | nd         | Cronin et al. (2015) & Medrano et al. (2014) |
| Ak145            | United States of America | Interior Alaska  | nd              | nd         | Cronin et al. (2015) & Medrano et al. (2014) |

| <b>Sample ID</b> | <b>Country</b>           | <b>Region</b>            | <b>Locality</b>                                | <b>Sex</b> | <b>Reference</b>                             |
|------------------|--------------------------|--------------------------|------------------------------------------------|------------|----------------------------------------------|
| Ak147            | United States of America | Interior Alaska          | nd                                             | nd         | Cronin et al. (2015) & Medrano et al. (2014) |
| Ak148            | United States of America | Interior Alaska          | nd                                             | nd         | Cronin et al. (2015) & Medrano et al. (2014) |
| Ak149            | United States of America | Interior Alaska          | nd                                             | nd         | Cronin et al. (2015) & Medrano et al. (2014) |
| Ak150            | United States of America | Interior Alaska          | nd                                             | nd         | Cronin et al. (2015) & Medrano et al. (2014) |
| Ak152            | United States of America | Interior Alaska          | nd                                             | nd         | Cronin et al. (2015) & Medrano et al. (2014) |
| Ak153            | United States of America | Interior Alaska          | nd                                             | nd         | Cronin et al. (2015) & Medrano et al. (2014) |
| Ak154            | United States of America | Interior Alaska          | nd                                             | nd         | Cronin et al. (2015) & Medrano et al. (2014) |
| SEAk97           | United States of America | Game Management Units 1A | Southernmost mainland and Revillagigedo Island | nd         | Cronin et al. (2015) & Medrano et al. (2014) |
| SEAk98           | United States of America | Game Management Units 1A | Southernmost mainland and Revillagigedo Island | nd         | Cronin et al. (2015) & Medrano et al. (2014) |
| SEAk99           | United States of America | Game Management Units 1A | Southernmost mainland and Revillagigedo Island | nd         | Cronin et al. (2015) & Medrano et al. (2014) |
| SEAk103          | United States of America | Game Management Units 1A | Southernmost mainland and Revillagigedo Island | nd         | Cronin et al. (2015) & Medrano et al. (2014) |
| SEAk107          | United States of America | Game Management Units 1A | Southernmost mainland and Revillagigedo Island | nd         | Cronin et al. (2015) & Medrano et al. (2014) |
| SEAk206          | United States of America | Game Management Units 1A | Southernmost mainland and Revillagigedo Island | nd         | Cronin et al. (2015) & Medrano et al. (2014) |
| SEAk213          | United States of America | Game Management Units 1A | Southernmost mainland and Revillagigedo Island | nd         | Cronin et al. (2015) & Medrano et al. (2014) |
| SEAk216          | United States of America | Game Management Units 1A | Southernmost mainland and Revillagigedo Island | nd         | Cronin et al. (2015) & Medrano et al. (2014) |
| SEAk220          | United States of America | Game Management Units 1A | Southernmost mainland and Revillagigedo Island | nd         | Cronin et al. (2015) & Medrano et al. (2014) |
| SEAk223          | United States of America | Game Management Units 1A | Southernmost mainland and Revillagigedo Island | nd         | Cronin et al. (2015) & Medrano et al. (2014) |
| SEAk217          | United States of America | Game Management Units 1A | Southernmost mainland and Revillagigedo Island | nd         | Cronin et al. (2015) & Medrano et al. (2014) |
| SEAk218          | United States of America | Game Management Units 1A | Southernmost mainland and Revillagigedo Island | nd         | Cronin et al. (2015) & Medrano et al. (2014) |
| SEAk246          | United States of America | Game Management Units 1A | Southernmost mainland and Revillagigedo Island | nd         | Cronin et al. (2015) & Medrano et al. (2014) |
| SEAk249          | United States of America | Game Management Units 1A | Southernmost mainland and Revillagigedo Island | nd         | Cronin et al. (2015) & Medrano et al. (2014) |
| SEAk250          | United States of America | Game Management Units 1A | Southernmost mainland and Revillagigedo Island | nd         | Cronin et al. (2015) & Medrano et al. (2014) |

| Sample ID | Country                  | Region                   | Locality                                       | Sex | Reference                                    |
|-----------|--------------------------|--------------------------|------------------------------------------------|-----|----------------------------------------------|
| SEAk267   | United States of America | Game Management Units 1A | Southernmost mainland and Revillagigedo Island | nd  | Cronin et al. (2015) & Medrano et al. (2014) |
| SEAk268   | United States of America | Game Management Units 1A | Southernmost mainland and Revillagigedo Island | nd  | Cronin et al. (2015) & Medrano et al. (2014) |
| SEAk200   | United States of America | Game Management Units 3  | Kupranof, Etolin, Mitkof islands               | nd  | Cronin et al. (2015) & Medrano et al. (2014) |
| SEAk219   | United States of America | Game Management Units 3  | Kupranof, Etolin, Mitkof islands               | nd  | Cronin et al. (2015) & Medrano et al. (2014) |
| SEAk224   | United States of America | Game Management Units 3  | Kupranof, Etolin, Mitkof islands               | nd  | Cronin et al. (2015) & Medrano et al. (2014) |
| SEAk226   | United States of America | Game Management Units 3  | Kupranof, Etolin, Mitkof islands               | nd  | Cronin et al. (2015) & Medrano et al. (2014) |
| SEAk235   | United States of America | Game Management Units 3  | Kupranof, Etolin, Mitkof islands               | nd  | Cronin et al. (2015) & Medrano et al. (2014) |
| SEAk236   | United States of America | Game Management Units 3  | Kupranof, Etolin, Mitkof islands               | nd  | Cronin et al. (2015) & Medrano et al. (2014) |
| SEAk241   | United States of America | Game Management Units 3  | Kupranof, Etolin, Mitkof islands               | nd  | Cronin et al. (2015) & Medrano et al. (2014) |
| SEAk242   | United States of America | Game Management Units 3  | Kupranof, Etolin, Mitkof islands               | nd  | Cronin et al. (2015) & Medrano et al. (2014) |
| SEAk243   | United States of America | Game Management Units 3  | Kupranof, Etolin, Mitkof islands               | nd  | Cronin et al. (2015) & Medrano et al. (2014) |
| SEAk244   | United States of America | Game Management Units 3  | Kupranof, Etolin, Mitkof islands               | nd  | Cronin et al. (2015) & Medrano et al. (2014) |
| SEAk245   | United States of America | Game Management Units 3  | Kupranof, Etolin, Mitkof islands               | nd  | Cronin et al. (2015) & Medrano et al. (2014) |
| SEAk247   | United States of America | Game Management Units 3  | Kupranof, Etolin, Mitkof islands               | nd  | Cronin et al. (2015) & Medrano et al. (2014) |
| SEAk251   | United States of America | Game Management Units 3  | Kupranof, Etolin, Mitkof islands               | nd  | Cronin et al. (2015) & Medrano et al. (2014) |
| SEAk252   | United States of America | Game Management Units 3  | Kupranof, Etolin, Mitkof islands               | nd  | Cronin et al. (2015) & Medrano et al. (2014) |
| SEAk254   | United States of America | Game Management Units 3  | Kupranof, Etolin, Mitkof islands               | nd  | Cronin et al. (2015) & Medrano et al. (2014) |
| SEAk258   | United States of America | Game Management Units 3  | Kupranof, Etolin, Mitkof islands               | nd  | Cronin et al. (2015) & Medrano et al. (2014) |
| SEAk260   | United States of America | Game Management Units 3  | Kupranof, Etolin, Mitkof islands               | nd  | Cronin et al. (2015) & Medrano et al. (2014) |
